# Supplementary material for: The Combination of IFN β and TNF Induces an Antiviral and Immunoregulatory Program via Non-Canonical Pathways Involving STAT2 and IRF9
Source: MDPI journal article supplement (doi:10.3390/cells8080919), 2019-08-17
Supplement: s1 [file s1]

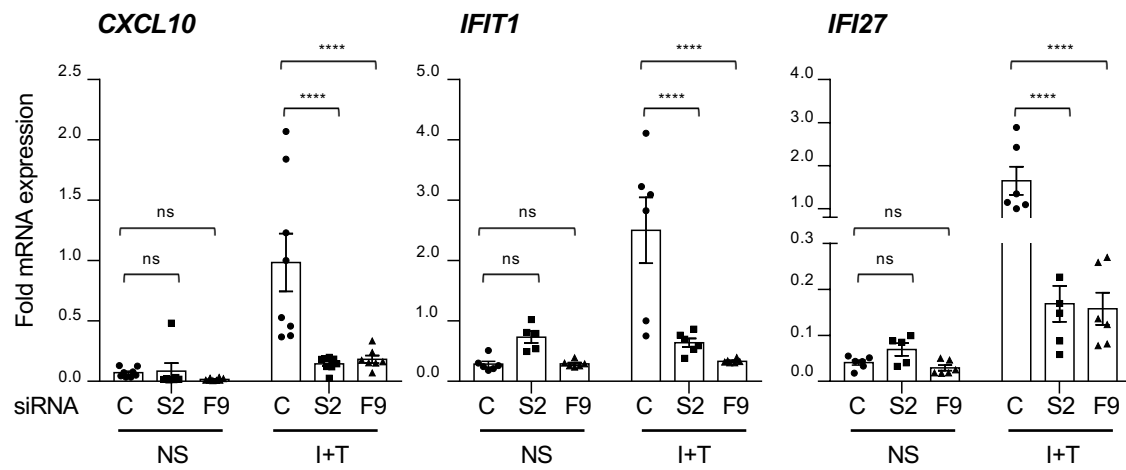

**Supplemental Figure S1.** qRT-PCR analysis of IFN $\beta$ +TNF (I+T) upregulated DEGs positively regulated by STAT2 and IRF9. U3A cells were transfected with siCTRL (C), siSTAT2 (S2) or siIRF9 (F9). Cells were further left untreated or stimulated with I+T for 24h. Quantification of the mRNA corresponding to the indicated genes was performed by qRT-PCR and expressed as relative expression (DDCt) after normalization to the S9 mRNA levels. Mean  $\pm$  SEM,  $n \geq 5$ . Statistical comparison was conducted using Two-way ANOVA with tukey post-test.  $p < 0.0001$  (\*\*\*\*); ns: not significant.
